# Supplementary material
Source: publisher figshare collection journal article supplement (https://acs.figshare.com/ndownloader/files/14093864)
Supplement: Supplementary file 1 [file 14093864]

## Supporting Information

# Probing the Role of Imidazopyridine and Imidazophosphorine Scaffolds to Design Novel Proton Pump Inhibitor for $H^+,K^+$ -ATPase: A DFT Study

Kalyanashis Jana<sup>a,b</sup>, Shibaji Ghosh<sup>a,b</sup>, Padmaja D. Wakchaure<sup>a,b</sup>, Tusar Bandyopadhyay<sup>c</sup>, and Bishwajit Ganguly<sup>a,b,\*</sup>

<sup>a</sup>Computation and Simulation Unit (Analytical Discipline and Centralized Instrument Facility), CSIR–Central Salt and Marine Chemicals Research Institute, Bhavnagar–364002, Gujarat, India

<sup>b</sup>Academy of Scientific and Innovative Research, CSIR–CSMCRI, Bhavnagar–364002, Gujarat, India

<sup>c</sup>Theoretical Chemistry Section, Chemistry Group MOD LAB, Bhabha Atomic Research Centre, Trombay, Mumbai 400 085, India

\* To whom correspondence should be addressed. E-mail: [ganguly@csmcri.res.in](mailto:ganguly@csmcri.res.in) and [gang\\_12@rediffmail.com](mailto:gang_12@rediffmail.com)

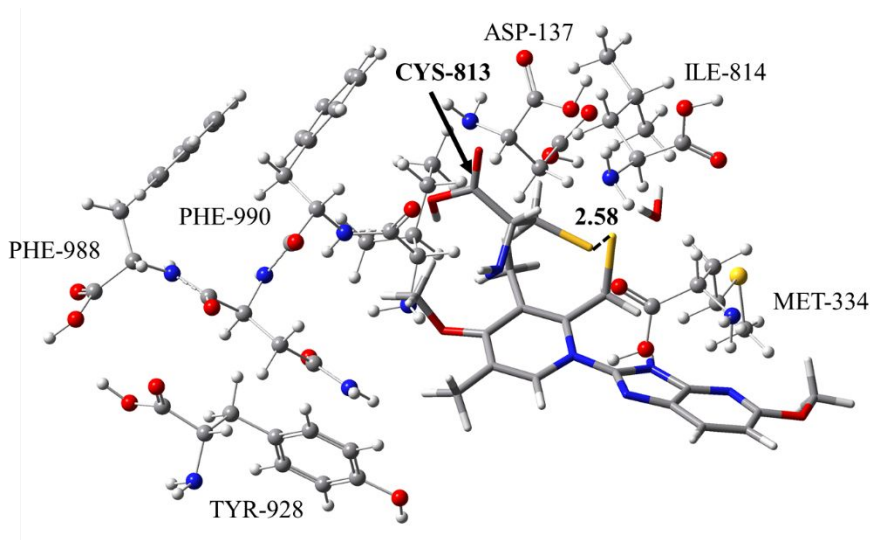

Figure S1: TS4 of Tenatoprazole with binding site residues of  $H^+,K^+$ -ATPase

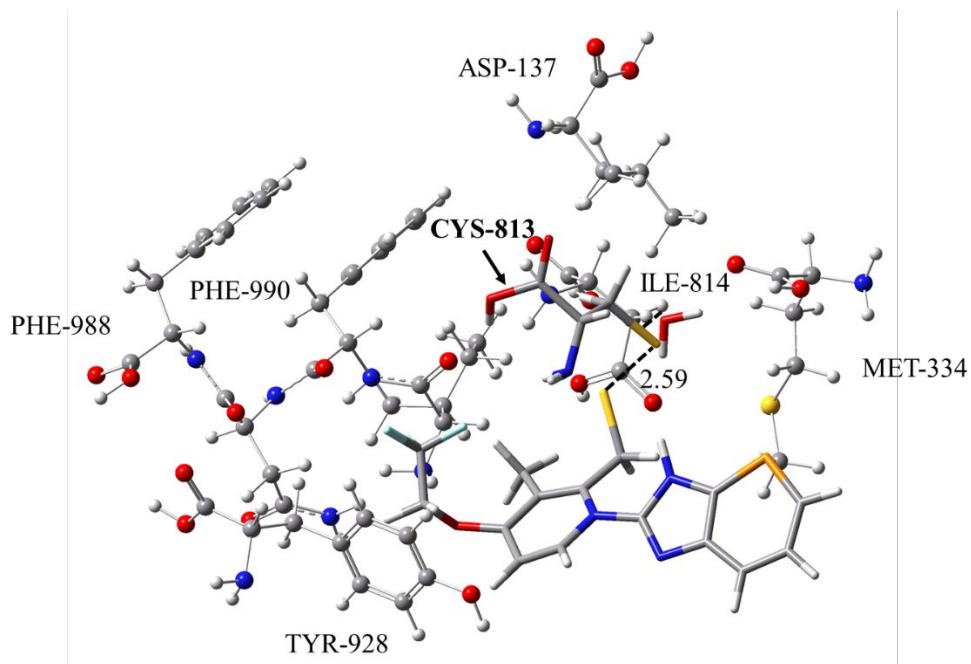

Figure S2: TS4 of Inhibitor-5 with binding site residues of  $H^+,K^+$ -ATPase

Tenatoprazole and inhibitor-5 with binding site residues are optimized, The transition state was treated with m062x/6-31g(d) and second layer of residues treated with MM force field uff. The ONIOM optimized geometries were taken for single point calculations at M11L/6-31++G(d,p) in aqueous phase using SMD solvation model to obtain the energies.
